# Supplementary material for: Legume Grains as an Alternative to Soybean Meal in the Diet of Intensively Reared Dairy Ewes
Source: MDPI journal article supplement (doi:10.3390/su15021028), 2023-01-05
Supplement: s1 [file s1]

## Legume grains as alternative to soybean meal in the diet of intensively reared dairy ewes

S. Vouraki, V. Papanikolopoulou, M. Irakli, E.M. Abraham, Z. Parissi, G. Arsenos

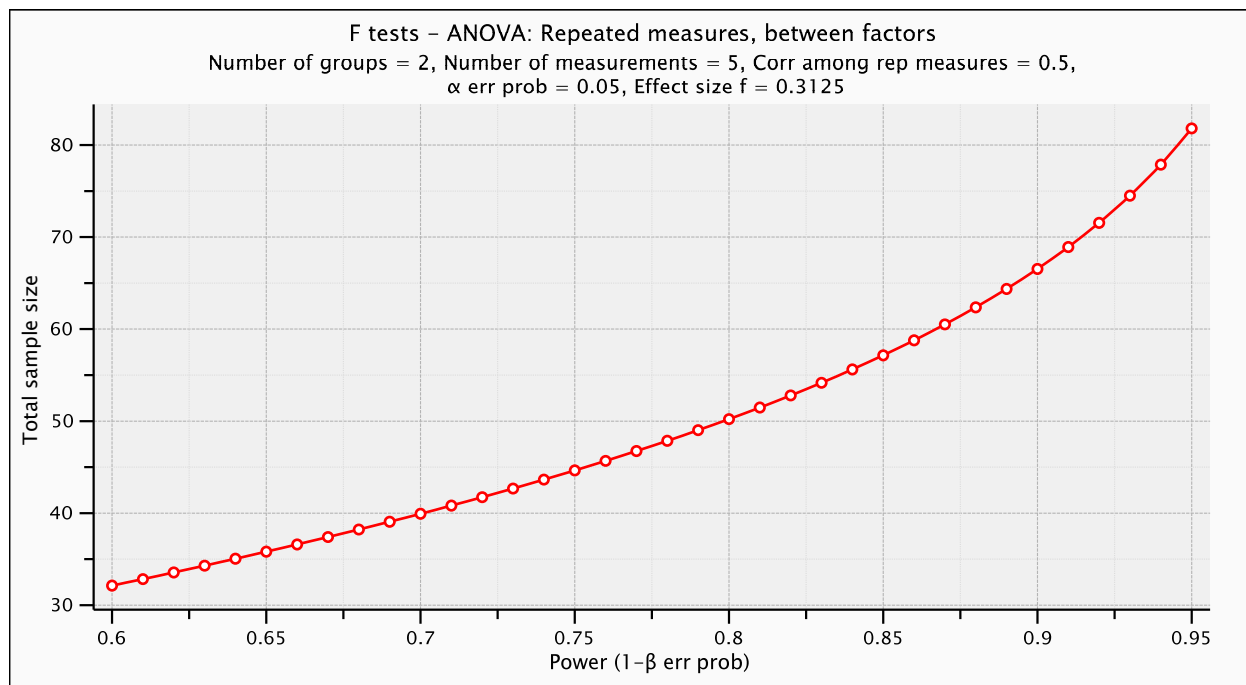

**Figure S1.** Graphical representation of minimum sample size calculation (G\*Power v.3.1.9.7)
